# Supplementary material for: Microarray analysis of microRNA expression in the developing mammalian brain
Source: PubMed Central journal article supplement (PMC522875; doi:10.1186/gb-2004-5-9-r68), 2004-08-31
Supplement: gb-2004-5-9-r68-s1.pdf [file gb-2004-5-9-r68-s1.pdf]

**mmu-let-7a-1 *Mus musculus* let-7a-1 precursor RNA**

>gi|34874105|ref|NW\_047490.1|Rn17\_2012 *Rattus norvegicus* chromosome 17 WGS supercontig

Mouse: 1 ttcactgtgggatgaggtagtaggttgatagtttaggtcacaccaccactgggaga 60  
|||  
Rat: 3523419 ttcactgtgggatgaggtagtaggttgatagtttaggtcacaccaccactgggaga 3523478  
|||  
Mouse: 61 taactatacaatctactgtctttcctaaggtgat 94  
|||  
Rat: 3523479 taactatacaatctactgtctttcctaaggtgat 3523512  
|||

**mmu-let-7a-2 *Mus musculus* let-7a-2 precursor RNA**

>gi|34865068|ref|NW\_047799.1|Rn8\_2323 *Rattus norvegicus* chromosome 8 WGS supercontig

Mouse: 3 gcatgttcccagggttaggttaggttgatagtttagagttacatcaaggagataac 62  
|||  
Rat: 14144995 gcatgttcccagggttaggttaggttgatagtttagagttacaacaaggagataac 14145054  
|||  
Mouse: 63 tgtacagcctcctagctttccttgggacttgac 96  
|||  
Rat: 14145055 tgtacagcctcctagctttccttgggacttgac 14145088  
|||

**mmu-let-7b *Mus musculus* let-7b precursor RNA**

>gi|34934010|ref|NW\_047783.1|Rn7\_2307 *Rattus norvegicus* chromosome 7 WGS supercontig

Mouse: 4 gggtaggttaggttggtgtggtttcagggcagtgatggtgcccctccgaagataacta 63  
|||  
Rat: 1610759 gggtaggttaggttggtgtggtttcagggcagtgatggtgcccctccgaagataacta 1610818  
|||  
Mouse: 64 tacaacctactgccttcctga 85  
|||  
Rat: 1610819 tacaacctactgccttcctga 1610840  
|||

**mmu-let-7c-1 *Mus musculus* let-7c-1 precursor RNA**

>gi|34933964|ref|NW\_047354.1|Rn11\_1874 *Rattus norvegicus* chromosome 11 WGS supercontig

Mouse: 1 tgtgtgcatccgggttaggttaggttgatggttagagttacaccctgggaggttaa 60  
|||  
Rat: 16398264 tgtgtgcatccgggttaggttaggttgatggttagagttacaccctgggaggttaa 16398323  
|||  
Mouse: 61 ctgtacaaccttctagctttccttgggagcacact 94  
|||  
Rat: 16398324 ctgtacaaccttctagctttccttgggagcacact 16398357  
|||

**mmu-let-7c-2 *Mus musculus* let-7c-2 precursor RNA**

>gi|34934010|ref|NW\_047783.1|Rn7\_2307 *Rattus norvegicus* chromosome 7 WGS supercontig

Mouse: 1 acggccttggggtgaggttaggttgatggtttgggctctgccccgctctgcggtta 60  
|||  
Rat: 1610341 acggccttggggtgaggttaggttgatggtttgggctctgccccgctctgcggtta 1610400  
|||  
Mouse: 61 actatacaatctactgtctttcctgaagtggccgc 95  
|||  
Rat: 1610401 actatacaatctactgtctttcctgaagtggccgc 1610435  
|||

**mmu-let-7e *Mus musculus* let-7e precursor RNA**

>gi|34854887|ref|NW\_047555.1|Rn1\_2077 *Rattus norvegicus* chromosome 1 WGS supercontig

Mouse: 1 cgcgcccccggtgaggttaggttgatagttgaggaagacaccgaggagatcac 60  
|||  
Rat: 1805450 cgcgcccccggtgaggttaggttgatagttgaggaagacaccgaggagatcac 1805509  
|||  
Mouse: 61 tatacggcctcctagctttccccaggctgcgcc 93  
|||

Rat: 1805510 tatacggcctcctagctttccccaggctgcgcc 1805542

**hsa-let-7i Homo sapiens let-7i precursor RNA**

>gi|34865737|ref|NW\_047776.1|Rn7\_2300 *Rattus norvegicus* chromosome 7 WGS  
supercontig

Mouse: 1 ctggctgaggtagtagtttgctgttggtcgggttgacattgcccgtgtggagata 60  
|||  
Rat: 3609065 ctggctgaggtagtagtttgctgttggtcgggttgacattgcccgtgtggagata 3609006  
|||  
Mouse: 61 actgcgcaagctactgccttgcta 84  
|||  
Rat: 3609005 actgcgcaagctactgccttgcta 3608982  
|||

**mmu-mir-7-1 Mus musculus miR-7-1 precursor RNA**

>gi|34873863|ref|NW\_047487.1|Rn17\_2009 *Rattus norvegicus* chromosome 17 WGS  
supercontig

Mouse: 1 ttggatgttgccctagttctgtggaagactagtgatgatttgggttttagataactaa 60  
|||  
Rat: 6715460 ttggatgttgccctagttctgtggaagactagtgatgatttgggttttagataactaa 6715519  
|||  
Mouse: 61 aacgacaacaaatcacagtctgccatattggcacaggccacctctacag 108  
|||  
Rat: 6715520 aacgacaacaaatcacagtctgccatattggcacaggccacctctacag 6715567  
|||

**mmu-mir-7-2 Mus musculus miR-7-2 precursor RNA**

>gi|34857743|ref|NW\_047560.1|Rn1\_2082 *Rattus norvegicus* chromosome 1 WGS  
supercontig

Mouse: 8 ccagccccgttgggaagactagtgatgatttgggtgtgtctctgtatccaacaacaagtc 67  
|||  
Rat: 14956730 ccagccctgtctggaagactagtgatgatttgggtgtgtctctgtgt--ccaacaacaagtc 14956787  
|||  
Mouse: 68 ccagtctgccacatggtgctgggtca 92  
|||  
Rat: 14956788 ccagtctgccacatggtgctgggtca 14956810  
|||

**mmu-mir-9-1 Mus musculus miR-9-1 precursor RNA**

>gi|34858271|ref|NW\_047626.1|Rn2\_2148 *Rattus norvegicus* chromosome 2 WGS  
supercontig

Mouse: 1 cggggttggttattctttggttattctagctgtatgagtggtgtggagtcttcataaag 60  
|||  
Rat: 6714042 cggggttggttattctttggttattctagctgtatgagtggtgtggagtcttcataaag 6714101  
|||  
Mouse: 61 ctagataaccgaaagtaaaaataacccca 89  
|||  
Rat: 6714102 ctagataaccgaaagtaaaaataacccca 6714130  
|||

**mmu-mir-9-3 Mus musculus miR-9-3 precursor RNA**

>gi|34857743|ref|NW\_047560.1|Rn1\_2082 *Rattus norvegicus* chromosome 1 WGS  
supercontig

Mouse: 1 ggaggcccgttctctctttggttattctagctgtatgagtgccacagagccgtcataaag 60  
|||  
Rat: 15603655 ggaggcccgttctctctttggttattctagctgtatgagtgccacagagccgtcataaag 15603714  
|||  
Mouse: 61 ctagataaccgaaagtagaaatgactct 88  
|||  
Rat: 15603715 ctagataaccgaaagtagaaatgactct 15603742  
|||

**mmu-mir-9-2 Mus musculus miR-9-2 precursor RNA**

>gi|34853324|ref|NW\_047616.1|Rn2\_2138 *Rattus norvegicus* chromosome 2 WGS  
supercontig

Mouse: 1 gttgttattctttggttattctagctgtatgagtgattggtcttcataaagctagataacc 60  
|||  
Rat: 6903262 gttgttattctttggttattctagctgtatgagtgattggtcttcataaagctagataacc 6903203  
|||

Mouse: 61 gaaagtaaaaac 72  
|||||  
Rat: 6903202 gaaagtaaaaac 6903191

**mmu-mir-16-2 Mus musculus miR-16-2 precursor RNA**

>gi|34857808|ref|NW\_047625.1|Rn2\_2147 *Rattus norvegicus* chromosome 2 WGS  
supercontig

Mouse: 5 ctgttccactctagcagcagcgtaaatattggcgtagtgaataaatattaaacaccaat 64  
|||||  
Rat: 45354558 ctgttccgctctagcagcagcgtaaatattggcgtagtgaataaatattaaacaccaat 45354617  
Mouse: 65 attattgtgctgctttagtgtgacagggata 95  
|||||  
Rat: 45354618 attattgtgctgctttagtgtgacagggata 45354648

**mmu-mir-24-1 Mus musculus miR-24-1 precursor RNA**

>gi|34873863|ref|NW\_047487.1|Rn17\_2009 *Rattus norvegicus* chromosome 17 WGS  
supercontig

Mouse: 1 ctccgggtgcctactgagctgatatcagttctcatttcacacactggctcagttcagcagg 60  
|||||  
Rat: 1862421 ctccgggtgcctactgagctgatatcagttctcatttcacacactggctcagttcagcagg 1862362  
Mouse: 61 aacaggag 68  
|||||  
Rat: 1862361 aacaggag 1862354

**mmu-mir-24-2 Mus musculus miR-24-2 precursor RNA**

>gi|34851559|ref|NW\_047534.1|Rn19\_2056 *Rattus norvegicus* chromosome 19 WGS  
supercontig

Mouse: 1 gcctctctccgggctccgcctcccgctgcctactgagctgaaacagttgattccagtgac 60  
|||||  
Rat: 10919959 gcctctccctgggctccgcctcctgtgcctactgagctgaaacagttgattccagtgac 10919900  
Mouse: 61 tggctcagttcagcaggaacaggagtccagcccc-tagtagctggca 107  
|||||  
Rat: 10919899 tggctcagttcagcaggaacaggagtccagccccataggagctggca 10919852

**mmu-mir-26b Mus musculus miR-26b precursor RNA**

>gi|34877332|ref|NW\_047816.1|Rn9\_2340 *Rattus norvegicus* chromosome 9 WGS  
supercontig

Mouse: 1 tgccccgggaccagttcaagtaattcaggataggttgtggtgctgaccagcctgttctcc 60  
|||||  
Rat: 17163277 tgccccgggaccagttcaagtaattcaggataggttgtggtgctgaccagcctgttctcc 17163336  
Mouse: 61 attacttggtcgggggcccgggtgcc 85  
|||||  
Rat: 17163337 attacttggtcgggggcccgggtgcc 17163361

**mmu-mir-28 Mus musculus miR-28 precursor RNA**

>gi|34869631|ref|NW\_047356.1|Rn11\_1876 *Rattus norvegicus* chromosome 11 WGS  
supercontig

Mouse: 1 ggtccctacctcaaggagctcacagtctattgagttgcctttctgattctcccactaga 60  
|||||  
Rat: 31535044 ggtccctaccgcaaggagctcacagtctattgagttgcctttctgattctcccactaga 31534985  
Mouse: 61 ttgtgagctgctggagggcaggcact 86  
|||||  
Rat: 31534984 ttgtgagctcctggagggcaggcact 31534959

**mmu-mir-29a Mus musculus miR-29a precursor RNA**

>gi|34855362|ref|NW\_047689.1|Rn4\_2212 *Rattus norvegicus* chromosome 4 WGS  
supercontig

Mouse: 1 accccttagaggatgactgatttcttttggtgttcagagtcaatagaattttctagacc 60

```
|||||
Rat: 28825083 accccttagaggatgactgatttcttttgggtgttcagagtcaatagaatttttctagcacc 28825024
Mouse: 61 atctgaaatcggttataatgattgggga 88
|||||
Rat: 28825023 atctgaaatcggttataatgattgggga 28824996
```

**mmu-mir-29c Mus musculus miR-29c precursor RNA**

```
>gi|34881453|ref|NW_047404.1|Rn13_1926 Rattus norvegicus chromosome 13 WGS
supercontig
Mouse: 1 atctcttacacaggctgaccgatttctcctgggtgttcagagtctgttttctagcacc 60
|||||
Rat: 2146548 atctcttacacaggctgaccgatttctcctgggtgttcagagtctgttttctagcacc 2146607
Mouse: 61 atttgaatcggttatgatgtaggggga 88
|||||
Rat: 2146608 atttgaatcggttatgatgtaggggga 2146635
```

**mmu-mir-29b-1 Mus musculus miR-29b-1 precursor RNA**

```
>gi|34855362|ref|NW_047689.1|Rn4_2212 Rattus norvegicus chromosome 4 WGS
supercontig
Mouse: 1 aggaagctggtttcatatggtgggttagattttaaatagtgattgtctagcaccattttaa 60
|||||
Rat: 28825451 aggaagctggtttcatatggtgggttagattttaaatagtgattgtctagcaccattttaa 28825392
Mouse: 61 atcagtgttct 71
|||||
Rat: 28825391 atcagtgttct 28825381
```

**mmu-mir-29b-2 Mus musculus miR-29b-2 precursor RNA**

```
>gi|34881453|ref|NW_047404.1|Rn13_1926 Rattus norvegicus chromosome 13 WGS
supercontig
Mouse: 1 cttctggaagctggtttcacatggtggccttagattttccatctttgtatctagcaccat 60
|||||
Rat: 2146020 cttctggaagctggtttcacatggtggccttagattttccatctttgtatctagcaccat 2146079
Mouse: 61 ttgaaatcagtgttttaggag 81
|||||
Rat: 2146080 ttgaaatcagtgttttaggag 2146100
```

**mmu-mir-30b Mus musculus miR-30b precursor RNA**

```
>gi|34867094|ref|NW_047780.1|Rn7_2304 Rattus norvegicus chromosome 7 WGS
supercontig
Mouse: 1 atgtaaacatcctacactcagctgtcatacatgcgttggtggatgtggatgtttacgt 60
|||||
Rat: 418464 atgtaaacatcctacactcagctgtcatacatgagttggctggatgtggatgtttacgt 418405
```

**mmu-mir-30c-1 Mus musculus miR-30c-1 precursor RNA**

```
>gi|34871316|ref|NW_047719.1|Rn5_2243 Rattus norvegicus chromosome 5 WGS
supercontig
Mouse: 1 accatgtttagtggtgtgtaaacatcctacactctcagctgtgagctcaagggtggctggg 60
|||||
Rat: 2519905 accatgtttagtggtgtgtaaacatcctacactctcagctgtgagctcaagggtggctggg 2519846
Mouse: 61 agagggttgtttactccttctgcatgga 89
|||||
Rat: 2519845 agagggttgtttactccttctgcatgga 2519817
```

**mmu-mir-30c-2 Mus musculus miR-30c-2 precursor RNA**

```
>gi|34875263|ref|NW_047813.1|Rn9_2337 Rattus norvegicus chromosome 9 WGS
supercontig
Mouse: 1 gagtgcagatattgtaaacatcctacactctcagctgtgaaaagtaagaagctgggag 60
|||||
```

Rat: 22164044 gagtgacagatactgtaaacatcctacactctcagctgtgaaaagtaagaaagctgggag 22164103  
Mouse: 61 aaggctgtttactctctctgcctt 84  
|||||  
Rat: 22164104 aaggctgtttactctctctgcctt 22164127

**mmu-mir-92-2 *Mus musculus* miR-92-2 precursor RNA**

>gi|34881658|ref|NW\_048049.1|RnX\_2574 *Rattus norvegicus* chromosome X WGS  
supercontig

Mouse: 1 tgccattcatccacaggtgggattggtggcattacttgtgtagatataaagtattgc 60  
|||||  
Rat: 2017453 tgccattcatccacaggtgggattagtgccattacttgtgtagataaaaagtattgc 2017394  
Mouse: 61 acttgtcccggcctgaggaagaaa 84  
|||||  
Rat: 2017393 acttgtcccggcctgaggaagaaa 2017370

**mmu-mir-93 *Mus musculus* miR-93 precursor RNA**

>gi|34871632|ref|NW\_047369.1|Rn12\_1890 *Rattus norvegicus* chromosome 12 WGS  
supercontig

Mouse: 1 agtcatgggggctccaaagtgctgttcgtgcaggtagtgtaattacctgacctactgctg 60  
|||||  
Rat: 5549656 agtcatgggggctccaaagtgctgttcgtgcaggtagtgca-ttgacctgacctactgctg 5549598  
Mouse: 61 agctagcacttcccagagccccaggaca 88  
|||||  
Rat: 5549597 agctagcacttcccagagccccaggaca 5549570

**mmu-mir-99a *Mus musculus* miR-99a precursor RNA**

>gi|34933964|ref|NW\_047354.1|Rn11\_1874 *Rattus norvegicus* chromosome 11 WGS  
supercontig

Mouse: 1 cataaaccgtagatccgatccttggtggaagtggaccgcaagctcgtttctatgggt 60  
|||||  
Rat: 16397552 cataaaccgtagatccgatccttggtggaagtggaccgacacaagctcgtttctatgggt 16397611  
Mouse: 61 ctgtg 65  
|||||  
Rat: 16397612 ctgtg 16397616

**mmu-mir-99b *Mus musculus* miR-99b precursor RNA**

>gi|34854887|ref|NW\_047555.1|Rn1\_2077 *Rattus norvegicus* chromosome 1 WGS  
supercontig

Mouse: 1 ggcaccaccgtagaaccgaccttgctggggccttcgcccacacaagctcgtgtctgtg 60  
|||||  
Rat: 1805285 ggcaccaccgtagaaccgaccttgctggggccttcgcccacacaagctcgtgtctgtg 1805344  
Mouse: 61 ggtccgtgtc 70  
|||||  
Rat: 1805345 ggtccgtgtc 1805354

**mmu-mir-103-1 *Mus musculus* miR-103-1 precursor RNA**

>gi|34872015|ref|NW\_047334.1|Rn10\_1854 *Rattus norvegicus* chromosome 10 WGS  
supercontig

Mouse: 1 ttcttactgcctcggcttctttacagtgtgccttgttgcataatggatcaagcagcatt 60  
|||||  
Rat: 7519813 ttcttactgcctcggcttctttacagtgtgccttgttgcataatggatcaagcagcatt 7519872  
Mouse: 61 gtacaggctatgaaggcattgagac 86  
|||||  
Rat: 7519873 gtacaggctatgaaggcattgagac 7519898

**mmu-mir-103-2 *Mus musculus* miR-103-2 precursor RNA**

>gi|34859757|ref|NW\_047658.1|Rn3\_2180 *Rattus norvegicus* chromosome 3 WGS  
supercontig

Mouse: 1 gtcttcgtgctttcagcttctttacagtgccttgtagcattcagggtcaagcagcatt 60  
|||  
Rat: 9173953 gtcttcgtgctttcagcttctttacagtgccttgtagcattcagggtcaagcagcatt 9174012  
|||  
Mouse: 61 gtacagggctatgaaagaaccaagaa 86  
|||  
Rat: 9174013 gtacagggctatgaaagaaccaagaa 9174038  
|||

**mmu-mir-124a-1 *Mus musculus* miR-124a-1 precursor RNA**

>gi|34875912|ref|NW\_047454.1|Rn15\_1976 *Rattus norvegicus* chromosome 15 WGS  
supercontig

Mouse: 1 aggcctctctctccgtgttcacagcggaccttgatttaaatgtccatacaattaaggcac 60  
|||  
Rat: 15806503 aggcctctctctccgtgttcacagcggaccttgatttaaatgtccatacaattaaggcac 15806562  
|||  
Mouse: 61 gcggtgaatgccaagaatggggctg 85  
|||  
Rat: 15806563 gcggtgaatgccaagaatggggctg 15806587  
|||

**mmu-mir-124a-2 *Mus musculus* miR-124a-2 precursor RNA**

>gi|34855621|ref|NW\_047624.1|Rn2\_2146 *Rattus norvegicus* chromosome 2 WGS  
supercontig

Mouse: 1 atcaagatcagagactctgctctccgtgttcacagcggaccttgatttaaatgtccataca 60  
|||  
Rat: 7685115 atcaagatcagagactctgctctccgtgttcacagcggaccttgatttaaatgtccataca 7685174  
|||  
Mouse: 61 ttaaggcacgcggtgaatgccaagagcggagcctacggctgcactttaa 109  
|||  
Rat: 7685175 ttaaggcacgcggtgaatgccaagagcggagcctacggctgcactttaa 7685223  
|||

**mmu-mir-124a-3 *Mus musculus* miR-124a-3 precursor RNA**

>gi|34861141|ref|NW\_047667.1|Rn3\_2189 *Rattus norvegicus* chromosome 3 WGS  
supercontig

Mouse: 1 ctctgcgtgttcacagcggaccttgatttaaatgtctatacaattaaggcacgcggtgaat 60  
|||  
Rat: 505484 ctctgcgtgttcacagcggaccttgatttaaatgtctatacaattaaggcacgcggtgaat 505543  
|||  
Mouse: 61 gccaagag 68  
|||  
Rat: 505544 gccaagag 505551  
|||

**mmu-mir-125a *Mus musculus* miR-125a precursor RNA**

>gi|34854887|ref|NW\_047555.1|Rn1\_2077 *Rattus norvegicus* chromosome 1 WGS  
supercontig

Mouse: 1 ctgggtccctgagaccctttaacctgtgaggacgtccagggtcacagggtgaggttcttg 60  
|||  
Rat: 1805905 ctgggtccctgagaccctttaacctgtgaggacgtccagggtcacagggtgaggttcttg 1805964  
|||  
Mouse: 61 gagcctgg 68  
|||  
Rat: 1805965 gagcctgg 1805972  
|||

**mmu-mir-125b-2 *Mus musculus* miR-125b-2 precursor RNA**

>gi|34933964|ref|NW\_047354.1|Rn11\_1874 *Rattus norvegicus* chromosome 11 WGS  
supercontig

Mouse: 2 cctagtccctgagaccctaactgtgaggatattttagtaacatcacaagtcagggttcttg 61  
|||  
Rat: 16443677 cctagtccctgagaccctaactgtgaggatattttagtaacatcacaagtcagggttcttg 16443736  
|||  
Mouse: 62 ggacctaggc 71  
|||  
Rat: 16443737 ggacctaggc 16443746  
|||

**mmu-mir-125b-1 *Mus musculus* miR-125b-1 precursor RNA**

Mouse: 1            tgcgctcccctcagtcacctgagaccctaacttgtgatgttaccgtttaaatccacgggt 60  
                  |||||  
Rat: 14189379 tgcgctcccctcagtcacctgagaccctaacttgtgatgttaccgtttaaatccacgggt 14189438  
                  |||||  
Mouse: 61           taggctcttgggagctg 77  
                  |||||  
Rat: 14189439 taggctcttgggagctg 14189455  
                  |||||

**mmu-mir-127 *Mus musculus* miR-127 precursor RNA**

>gi|34935858|ref|NW\_047762.1|Rn6\_2286 *Rattus norvegicus* chromosome 6 WGS  
supercontig

Mouse: 1            ccagcctgctgaagctcagagggctctgattcagaaagatcatcggatccgtctgagctt 60  
                  |||||  
Rat: 29527445 ccagcctgctgaagctcagagggctctgattcagaaagatcatcggatccgtctgagctt 29527504  
                  |||||  
Mouse: 61           ggctggtcgg 70  
                  |||||  
Rat: 29527505 ggctggtcgg 29527514  
                  |||||

**mmu-mir-128a *Mus musculus* miR-128a precursor RNA**

>gi|34933508|ref|NW\_047394.1|Rn13\_1916 *Rattus norvegicus* chromosome 13 WGS  
supercontig

Mouse: 1            gttggattcggggccgtagcactgtctgagaggtttacatttctcacagtgaaccggctt 60  
                  |||||  
Rat: 1019804 gttggattcggggccgtagcactgtctgagaggtttacatttctcacagtgaaccggctt 1019863  
                  |||||  
Mouse: 61           ctttttcagc 70  
                  |||||  
Rat: 1019864 ctttttcagc 1019873  
                  |||||

**mmu-mir-128b *Mus musculus* miR-128b precursor RNA**

>gi|34866469|ref|NW\_047802.1|Rn8\_2326 *Rattus norvegicus* chromosome 8 WGS  
supercontig

Mouse: 1            cagtgggaagggggccgatgcactgtaagagagttagtagcaggtctcacagtgaaccg 60  
                  |||||  
Rat: 3171003 cagtgggaagggggccgatgcactgtaagagagttagtagcaggtctcacagtgaaccg 3170944  
                  |||||  
Mouse: 61           gtctctttccctactg 76  
                  |||||  
Rat: 3170943 gtctctttccctactg 3170928  
                  |||||

**mmu-mir-130a *Mus musculus* miR-130a precursor RNA**

>gi|34857850|ref|NW\_047657.1|Rn3\_2179 *Rattus norvegicus* chromosome 3 WGS  
supercontig

Mouse: 1            gagctcttttcacattgtgctactgtcta-acgtgtaccgagcagtgcaatgttaaagg 59  
                  |||||  
Rat: 9350850 gagctcttttcacattgtgctactgtctacacgtgtaccgagcagtgcaatgttaaagg 9350791  
                  |||||  
Mouse: 60           gcatc 64  
                  |||||  
Rat: 9350790 gcatc 9350786  
                  |||||

**mmu-mir-132 *Mus musculus* miR-132 precursor RNA**

>gi|34873416|ref|NW\_047336.1|Rn10\_1856 *Rattus norvegicus* chromosome 10 WGS  
supercontig

Mouse: 1            gggcaaccgtggctttcgattgttactgtgggaaccggaggtaacagtctacagccatgg 60  
                  |||||  
Rat: 3479949 gggcaaccgtggctttcgattgttactgtgggaaccggaggtaacagtctacagccatgg 3480008  
                  |||||  
Mouse: 61           tcgccc 66  
                  |||||  
Rat: 3480009 tcgccc 3480014  
                  |||||

**mmu-mir-136 *Mus musculus* miR-136 precursor RNA**

>gi|34935858|ref|NW\_047762.1|Rn6\_2286 *Rattus norvegicus* chromosome 6 WGS  
supercontig

Mouse: 1 gaggactccatttgttttgatgatggattcttaagctccatcatcgtctcaaatgagtct 60  
|||||  
Rat: 29530106 gaggactccatttgttttgatgatggattcttaagctccatcatcgtctcaaatgagtct 29530165  
Mouse: 61 tc 62  
||  
Rat: 29530166 tc 29530167

**mmu-mir-138-1 *Mus musculus* miR-138-1 precursor RNA**

>gi|34866724|ref|NW\_047804.1|Rn8\_2328 *Rattus norvegicus* chromosome 8 WGS  
supercontig

Mouse: 1 ctctagcatggtgttgggacagctggtgttgaatcaggccgttgccaatcagagaa 60  
|||||  
Rat: 156597 ctctggcatggtgttgggacagctggtgttgaatcaggccgttgccaatcagagaa 156656  
Mouse: 61 cggctacttcacaacaccagggccacactgcactgca 97  
|||||  
Rat: 156657 cggctacttcacaacaccaggggtctcactgcactgca 156693

**mmu-mir-138-2 *Mus musculus* miR-138-2 precursor RNA**

>gi|34851309|ref|NW\_047531.1|Rn19\_2053 *Rattus norvegicus* chromosome 19 WGS  
supercontig

Mouse: 1 cagctgggtgttgaatcaggccgacgagcagcgcacatcctcttaccggctatttcacga 60  
|||||  
Rat: 11119560 cagctgggtgttgaatcaggccgacgagcaacgcacatcctcttaccggctatttcacga 11119501  
Mouse: 61 caccagggttg 71  
|||||  
Rat: 11119500 caccagggttg 11119490

**mmu-mir-139 *Mus musculus* miR-139 precursor RNA**

>gi|34860310|ref|NW\_047562.1|Rn1\_2084 *Rattus norvegicus* chromosome 1 WGS  
supercontig

Mouse: 1 gtgtattctacagtgcacgtgtctccagtgtggctcggaggctggagacgcgccctgtt 60  
|||||  
Rat: 1586714 gtgtattctacagtgcacgtgtctccagtgtggctcggaggctggagacgcgccctgtt 1586773  
Mouse: 61 ggagtaac 68  
|||||  
Rat: 1586774 ggagtaac 1586781

**mmu-mir-142 *Mus musculus* miR-142 precursor RNA**

>gi|34873416|ref|NW\_047336.1|Rn10\_1856 *Rattus norvegicus* chromosome 10 WGS  
supercontig

Mouse: 1 acccataaagtagaaagcactactaactaacagcactggagggtgtagtgtttcctactttatg 60  
|||||  
Rat: 17049244 acccataaagtagaaagcactactaactaacagcactggagggtgtagtgtttcctactttatg 17049303  
Mouse: 61 gatg 64  
|||||  
Rat: 17049304 gatg 17049307

**mmu-mir-145 *Mus musculus* miR-145 precursor RNA**

>gi|34932227|ref|NW\_047514.1|Rn18\_2036 *Rattus norvegicus* chromosome 18 WGS  
supercontig

Mouse: 1 ctcacggtccagttttccagggaatcccttggatgctaagatggggattcctggaatac 60  
|||||  
Rat: 3665639 ctcacggtccagttttccagggaatcccttggatgctaagatggggattcctggaatac 3665580  
Mouse: 61 tgttcttgag 70  
|||||  
Rat: 3665579 tgttcttgag 3665570



**mmu-mir-146 *Mus musculus* miR-146 precursor RNA**

>gi|34872015|ref|NW\_047334.1|Rn10\_1854 *Rattus norvegicus* chromosome 10 WGS  
supercontig

Mouse: 1 agctctgagaactgaattccatgggttatatcaatgtcagacctgtgaaattcagttctt 60  
|||||  
Rat: 15301237 agctctgagaactgaattccatgggttatagcaatgtcagacctgtgaagttcagttctt 15301178  
Mouse: 61 cagct 65  
||||  
Rat: 15301177 tagct 15301173

**mmu-mir-150 *Mus musculus* miR-150 precursor RNA**

Mouse: 1 ccctgtctcccaaccctgtaccagtgctgtgcctcagaccctggtacaggcctggggga 60  
|||||  
Rat: 4552248 ccctgtctcccaaccctgtaccagtgctgtgcctcagaccctggtacaggcctggggga 4552307  
Mouse: 61 taggg 65  
||||  
Rat: 4552308 caggg 4552312

**mmu-mir-154 *Mus musculus* miR-154 precursor RNA**

Mouse: 1 gaagataggttatccgtggtgccttcgctttattcgtgacgaatcatacacggttgacct 60  
|||||  
Rat: 29762799 gaagataggttatccgtggtgccttcgctttattcgtgacgaatcatacacggttgacct 29762858  
Mouse: 61 attttt 66  
|||||  
Rat: 29762859 attttt 29762864

**mmu-mir-185 *Mus musculus* miR-185 precursor RNA**

>gi|34869997|ref|NW\_047358.1|Rn11\_1878 *Rattus norvegicus* chromosome 11 WGS  
supercontig

Mouse: 1 agggattggagagaaaggcagttcctgatggtcccctcccaggggctggctttcctctgg 60  
|||||  
Rat: 2687772 agggattggagagaaaggcagttcctgatggtcccctcccaggggctggctttcctctgg 2687831  
Mouse: 61 tcctt 65  
||||  
Rat: 2687832 tcctt 2687836

**mmu-mir-191 *Mus musculus* miR-191 precursor RNA**

>gi|34866469|ref|NW\_047802.1|Rn8\_2326 *Rattus norvegicus* chromosome 8 WGS  
supercontig

Mouse: 1 agcgggcaacggaatcccaaaagcagctggtgtctccagagcattccagctgcacttgg 60  
|||||  
Rat: 58055 agcgggcaacggaatcccaaaagcagctggtgtctccagagcattccagctgcacttgg 58114  
Mouse: 61 tttcgttcctgct 74  
|||||  
Rat: 58115 tttcgttcctgct 58128

**mmu-mir-213 *Mus musculus* miR-213 precursor RNA**

>gi|34880444|ref|NW\_047396.1|Rn13\_1918 *Rattus norvegicus* chromosome 13 WGS  
supercontig

Mouse: 1 ggttgcttcagtgaaattcaacgctgtcgggtgagtttgaattcaataaaaaccatcg 60  
|||||  
Rat: 1976067 ggttgcttcagtgaaattcaacgctgtcgggtgagtttgaattcaataaaaaccatcg 1976126  
Mouse: 61 accgttgattgtaccctatagctaacc 87  
|||||  
Rat: 1976127 accgttgattgtaccctatagctaacc 1976153

**mmu-mir-300 *Mus musculus* miR-300 precursor RNA**

>gi|34935858|ref|NW\_047762.1|Rn6\_2286 *Rattus norvegicus* chromosome 6 WGS supercontig

Mouse: 1 gctacttgaagagaggttatcctttgtgtgtttgctttacgcgaaatgaatatgcaaggg 60  
 ||||||||||||||||||||||||||||||||||||||||||||||||||||||||||||||||  
 Rat: 29748356 gctacttgaagagaggttatcctttgtgtgtttgctttacgcgaaatgaatatgcaaggg 29748415

Mouse: 61 caagctctcttcgaggagc 79  
 ||||||||||||||||||||  
 Rat: 29748416 caagctctcttcgaggagc 29748434

| Rat microRNA  | Predicted folding Energy (kcal/mole) | Predicted stem loop precursor                                                                                                                                         |
|---------------|--------------------------------------|-----------------------------------------------------------------------------------------------------------------------------------------------------------------------|
| rno-let-7a-2  | dG = -38.9                           | 10 20 30 40<br>--  UGC CU G U UAGAGUUACA<br>GCA UCCCAGG GAG UAG AGGUUGUAGUU \<br>CGU AGGGUUC UUC AUC UCCGACAUGUCAA A<br>CA^ UC- CU G C UAGAGGGAAC<br>90 80 70 60 50   |
| rno-let-7b    | dG = -44.0                           | ---  U - - - - - CA A<br>GGG GAGGUAGUAGGUUGUGUGUU UC AGGG GUG U<br>CCC UUCCGUCAUCCAACAUACAA AG UCC CGC G<br>AGU^ - U AAGCC -- U                                       |
| rno-mir-7-1   | dG = -46.8                           | U--  U U A U A A U -- A<br>UGGA GU GGCCU GU CUGUGUGG AGACU GUGAUUU GUUGUU UUUAG U<br>AUCU CA CCGGA CA GUAUACC UCUGA CACUAAA CAACAG GAAUC A<br>GAC^ C - - C G - - CA A |
| rno-mir-7-2   | dG = -29.1                           | ---  C C A AGU U UG C<br>CCAGC CUGU UGG AGACU GAUUU GUUGUUG U U<br>GGUUG GGUA ACC UCUGA CUGAA CAACAAC G G<br>ACU^ U C G CC- - CU U                                    |
| rno-mir-16-2  | dG = -36.9                           | ----  UC CU UA C AG AAU<br>CUUGU CGCU AGCAGCAGC AAUAUUGG GU UGA A<br>GGACA GUGA UCGUCGUGU UUAUAACC CA AUU A<br>AUAG^ GU UU UA A A- AUA                                |
| rno-mir-24-2  | dG = -53.5                           | -  U- CU--- CCGC G A AA UG U<br>GCC CUCC GGGCU CUCCUGU CCU CUGAGCUGA CAGU AU C<br>CGG GAGG CCCGA GAGGACA GGA GACUUGACU GUCA UG C<br>A^ UC AUACC CCU- A C CG CG A      |
| rno-mir-26b   | dG = -42.6                           | U  - GA - U UC UG G<br>GC CCGG CCC AGU CAAGUAA AGGAUAGGU UGGU C<br>CG GGCC GGG UCG GUUCAUUA UCUUGUCCG ACCG U<br>C^ U GG C - CC -- G                                   |
| rno-mir-28    | dG = -41.2                           | C A GCA UU-- U- CUU<br>GGU CCU CCC AGGAGCUCACAGUCUA GAG UC \<br>UCA GGA GGG UCCUCGAGUGUUAGAU CUC AG U<br>^ C C AGG CACC UU UCU                                        |
| rno-mir-30b   | dG = -28.1                           | U - -- U<br>AUGUAAACAUC ACACUCAGCUG UCA A<br>UGCAUUUGUAGG UGU GGGUCGGU AGU C<br>^ - A UG A                                                                            |
| rno-mir-30c-2 | dG = -28.0                           | GAGUGA  UACU U ACA GUGAAA<br>CAGA GUAAACA CCU CUCUCAGCU A<br>GUCU CAUUUGU GGA GAGGGUCGA G<br>UUCC--^ CUCU C A-- AAGAAU                                                |
| rno-mir-92-2  | dG = -36.5                           | UGCCCA  A A G U CAU GUGUU<br>UUC UCC CAGGU GGGAU AGUGC UACUU A<br>AAG AGG GUCCG CCCUG UCACG AUGAA G<br>A-----^ A A G U UU- AAAUA                                      |
| rno-mir-93    | dG = -48.2                           | A  A CA- - U G UG UU<br>GUC UGGGGGCUC AAGUGCU GUUCG GCAG UAG CA \<br>CAG ACCCCCGAG UUCACGA CGAGU CGUC AUC GU G<br>A^ G CCC U - - CA CC                                |

|                |            |                                                                                                                                               |
|----------------|------------|-----------------------------------------------------------------------------------------------------------------------------------------------|
| rno-mir-99a    | dG = -29.5 | A UC U G AAG<br>CAUA ACCCGUAGA CGA CUUGUG UG U<br>GUGU UGGGUAUCU GCU GAACAC GC G<br>^ C UU C - CAG                                            |
| rno-mir-125b-2 | dG = -33.3 | -  UC UG C A GG- U<br>CCUAG CC AGA CCU ACUUGUGA UAU U<br>GGAUC GG UCU GGA UGAACACU AUG U<br>C^ CA GU C C ACA A                                |
| rno-mir-130a   | dG = -24.7 | GA-  C UG A GUC A<br>GCUCUUUU ACAUUG CU CU UAC C<br>CGGGAAAA UGUUAC GA GA AUG G<br>CUA^ U GU C GCC U                                          |
| rno-mir-138-1  | dG = -50.6 | CUCUG  UG U AG UCA GCCAA<br>GCA GUGU GUGGGAC CUGGUGUUGUGAA GGCCGUU \<br>CGU CACG CACUCUG GACCACAACACUU UCGGC AA U<br>A----^ -- U G- CA- GAGAC |
| rno-mir-138-2  | dG = -29.1 | CAG--  UCA AC--- CAAC<br>CUGGUGUUGUGAA GGCCG GAG \<br>GACCACAGCACUU UCGGC CUC G<br>GUUGG^ UA- CCAUU CUAC                                      |
| rno-mir-146    | dG = -29.3 | CU C -- G<br>AGCU GAGAACUGAAUU CAUGGGUU AUA C<br>UCGA UUCUUGACUUGA GUGUCCAG UGU A<br>^ U- A AC A                                              |
