# Supplementary material for: Microarray analysis of microRNA expression in the developing mammalian brain
Source: PubMed Central journal article supplement (PMC522875; doi:10.1186/gb-2004-5-9-r68), 2004-08-31
Supplement: gb-2004-5-9-r68-s2.pdf [file gb-2004-5-9-r68-s2.pdf]

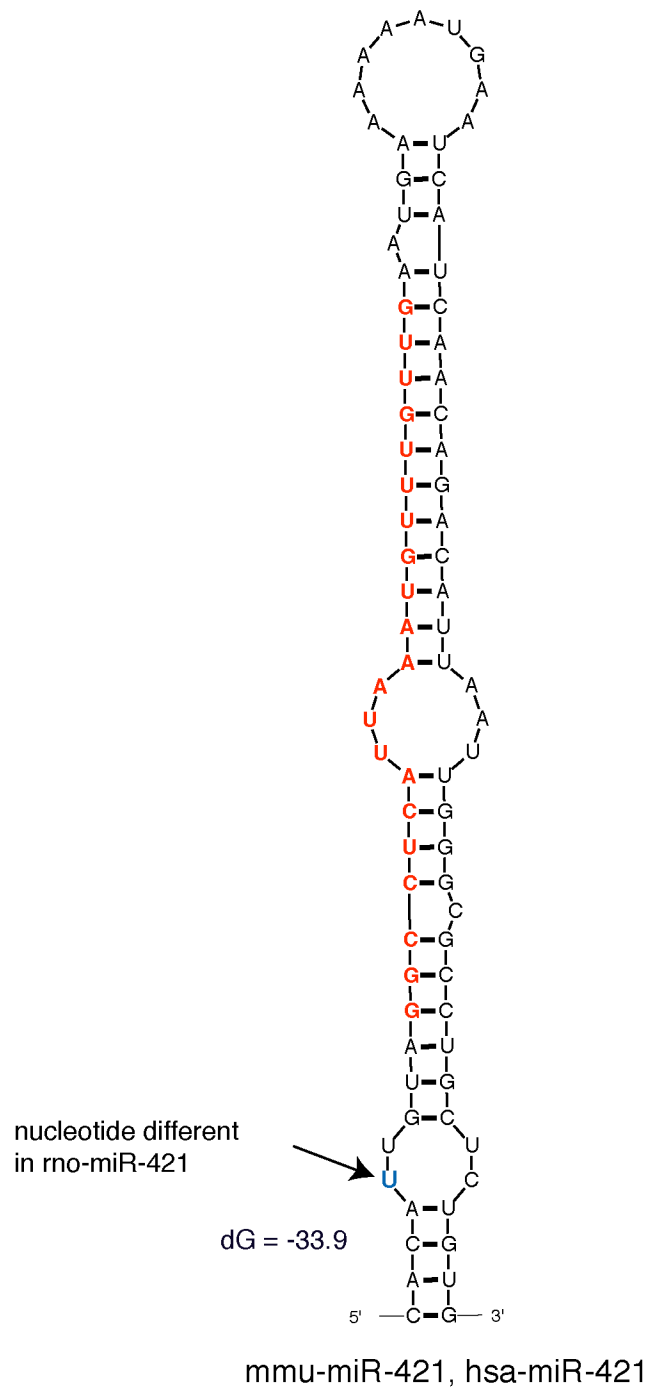

Figure AF2b

## Figure AF2a - Alignment of precursor sequences for microRNA mir-421

ref|NW\_048043.1|RnX\_2568 *Rattus norvegicus* chromosome X WGS supercontig

|                      |             |         |                                                                                          |         |
|----------------------|-------------|---------|------------------------------------------------------------------------------------------|---------|
| <i>R. norvegicus</i> | NW_048043.1 | 3077508 | CACACTGTA <b>GGCCTCATTAAATGTTTGTG</b> GAATGAAAAAATGAATCATCAACAGACATTAATTGGGCGCCTGCTCTGTG | 3077429 |
| <i>H. sapiens</i>    | AC004386.1  | 5060    | CACATTGTA <b>GGCCTCATTAAATGTTTGTG</b> GAATGAAAAAATGAATCATCAACAGACATTAATTGGGCGCCTGCTCTGTG | 4982    |
| <i>M. musculus</i>   | AL683845.15 | 39424   | CACATTGTA <b>GGCCTCATTAAATGTTTGTG</b> GAATGAAAAAATGAATCATCAACAGACATTAATTGGGCGCCTGCTCTGTG | 39346   |

\*
