# Supplementary material for: Microarray analysis of microRNA expression in the developing mammalian brain
Source: PubMed Central journal article supplement (PMC522875; doi:10.1186/gb-2004-5-9-r68), 2004-08-31
Supplement: gb-2004-5-9-r68-s4.pdf [file gb-2004-5-9-r68-s4.pdf]

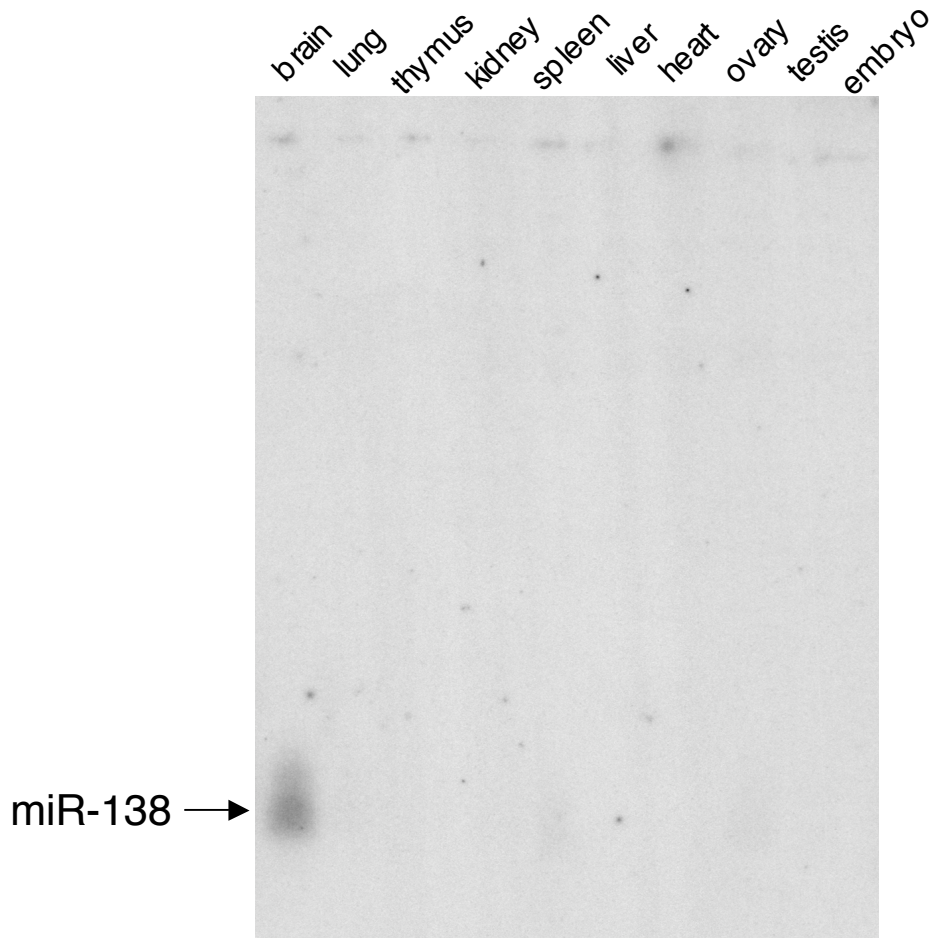

Figure AF4
